# Supplementary material for: In situ growth of lignin-based graphene-like films catalyzed by metal substrates
Source: Royal Society of Chemistry journal article supplement (doi:10.1039/d3gc00744h), 2023-01-01
Supplement: d3gc00744h1.pdf [file d3gc00744h1.pdf]

## **In Situ Growth of Lignin-Based Graphene-Like Film Catalyzed by Metal Substrates**

**Shuangxin Wang, Ying Yuan, Tongqi Yuan, and Xiluan Wang \***

*Beijing Key Laboratory of Lignocellulosic Chemistry, Beijing Forestry University,  
Beijing, 100083, P. R. China.*

*\*Corresponding author: Tel: +86-10-62336903; Fax: +86-10-62336903*

*E-mail address: wangxiluan@bjfu.edu.cn*

**Fig. S1** The heating procedure for G800 growth.

**Fig. S2** The TEM image of G800.

**Fig. S3** The TEM image of NG800.

**Fig. S4** The SAED of G800.

**Fig. S5** The AFM image of G800.

**Fig. S6** The 2D-HSQC spectra of AL. (a) sidechain region, (b) aromatic region.

**Fig. S7** The SEM image of Ni sheet surface before and after reaction.

**Fig. S8** The XRD of samples prepared at different temperatures.

**Fig. S9** The Raman spectrum of samples prepared at different temperatures.

**Table S1** The elemental analysis of AL

**Table S2** The Raman peaks of samples prepared at different temperatures.

**Table S3** The Electrical conductivity comparison of different materials.

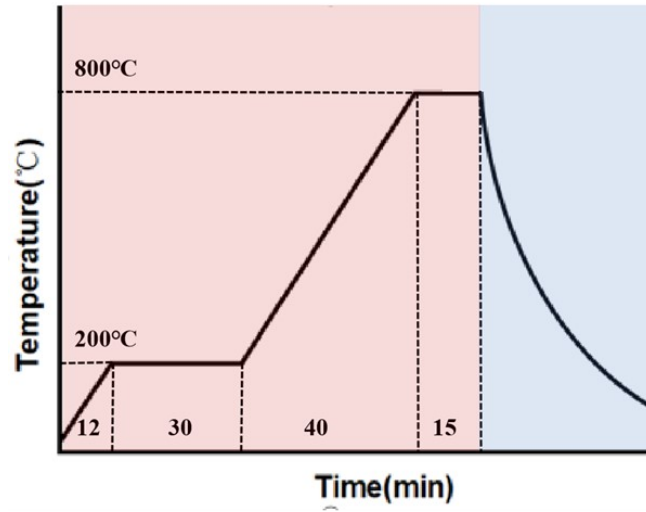

**Fig. S1** The heating procedure for G800 growth.

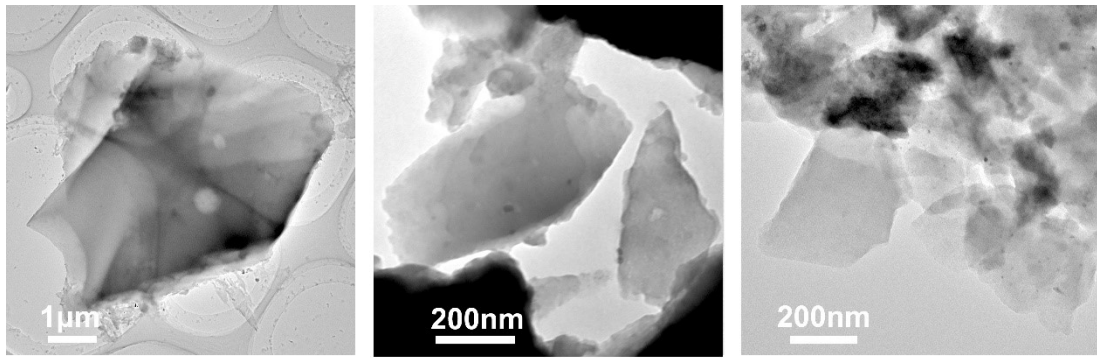

**Fig. S2** The TEM image of G800.

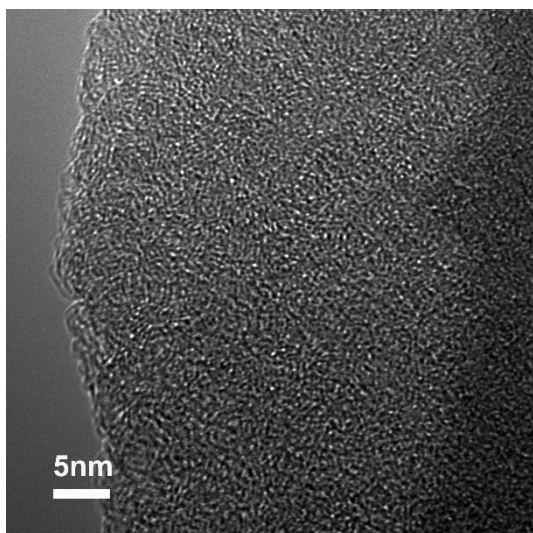

**Fig. S3** The TEM image of NG800.

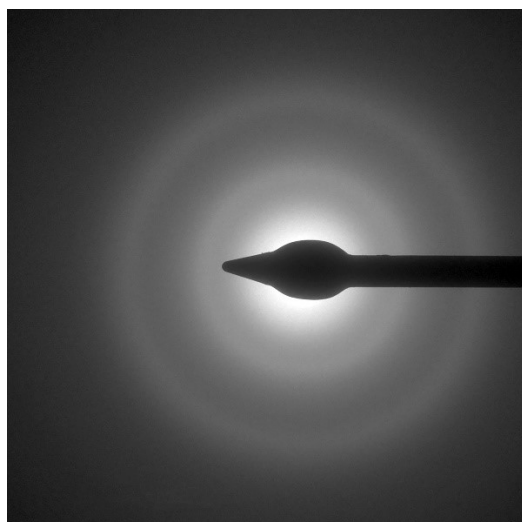

**Fig. S4** The SAED of G800.

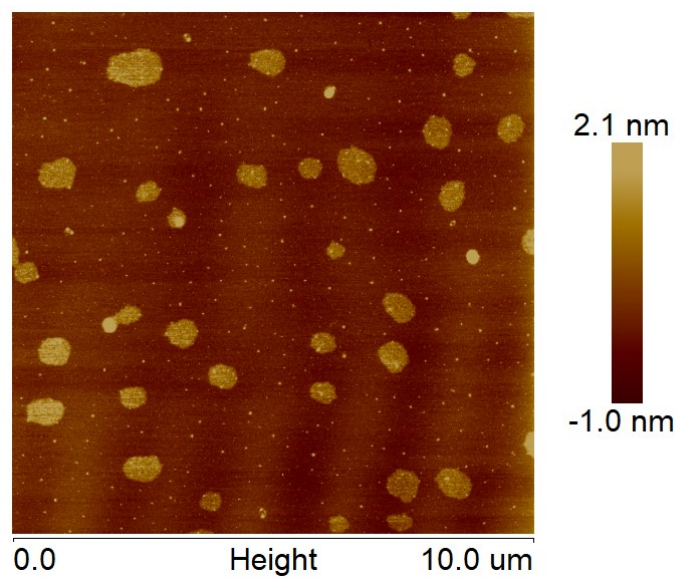

**Fig. S5** The AFM image of G800.

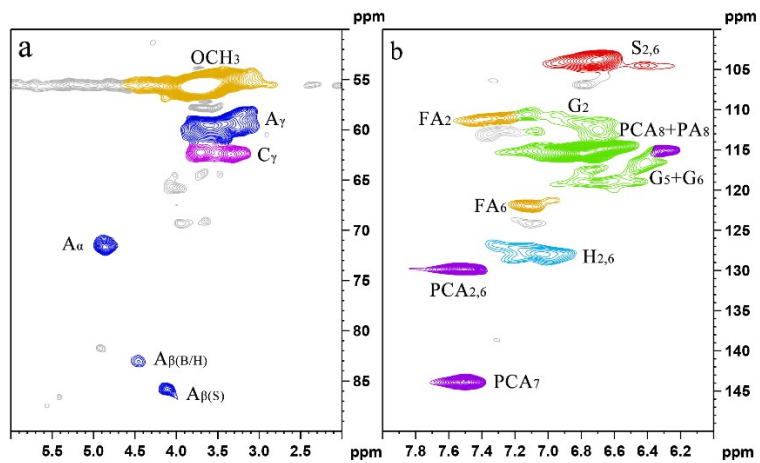

**Fig. S6** The 2D-HSQC spectra of AL. (a) sidechain region, (b) aromatic region.

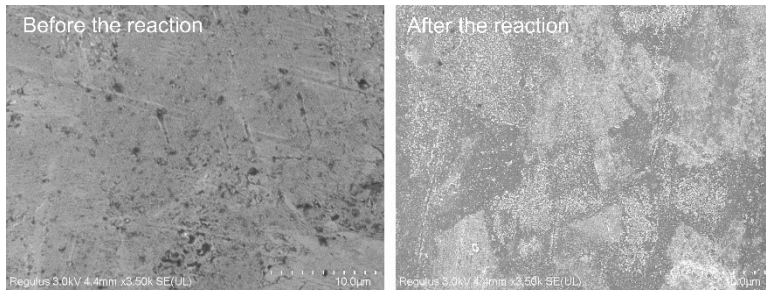

**Fig. S7** The SEM image of Ni sheet surface before and after reaction.



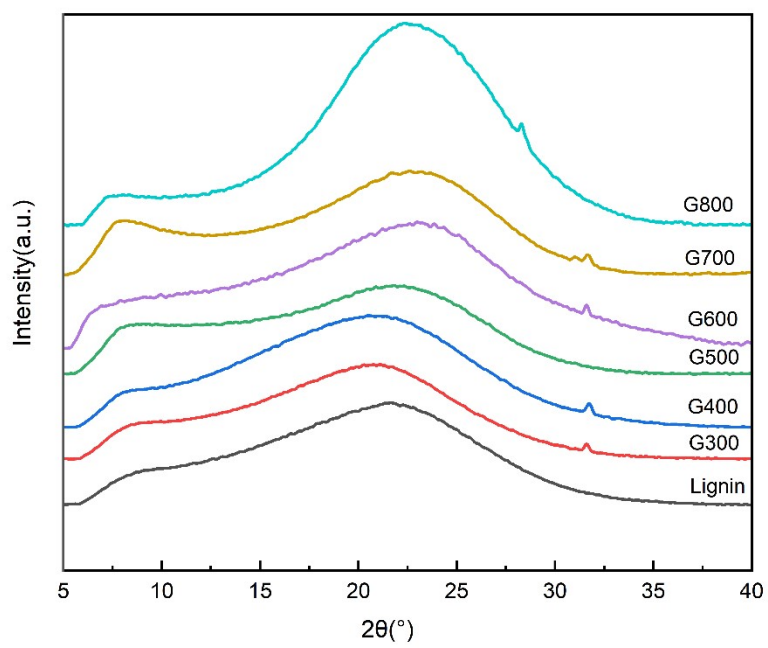

**Fig. S8** The XRD of samples prepared at different temperatures.

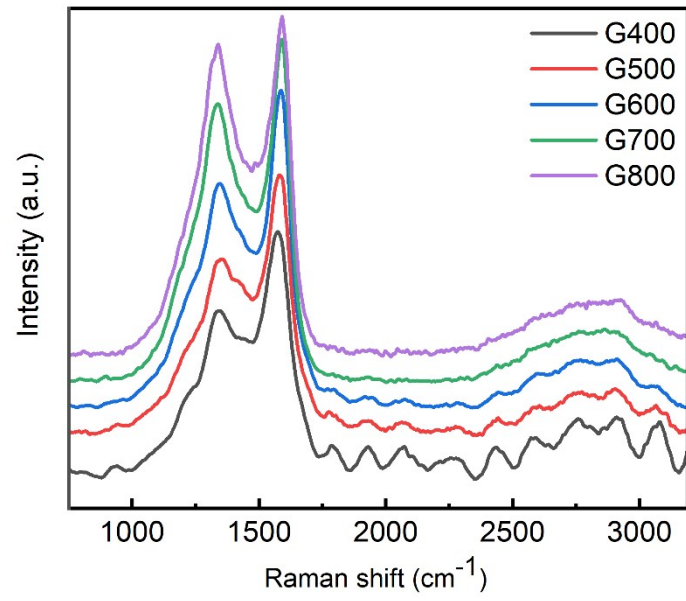

**Fig. S9** The Raman spectrum of samples prepared at different temperatures.

---

**Table S1** The elemental analysis of AL

---

| Sample | C content | O content | N content |
|--------|-----------|-----------|-----------|
| AL     | 82.38%    | 16.75%    | 0.87%     |

---

---

**Table S2** The Raman peaks of samples prepared at different temperatures

---

| Materials | D band                        | G band                        | 2D band                       | $I_D/I_G$ | $I_{2D}/I_G$ | Crystallinity |
|-----------|-------------------------------|-------------------------------|-------------------------------|-----------|--------------|---------------|
|           | Position ( $\text{cm}^{-1}$ ) | Position ( $\text{cm}^{-1}$ ) | Position ( $\text{cm}^{-1}$ ) |           |              |               |
| G400      | 1345                          | 1574                          | 2911                          | 0.671     | 0.202        | 15.43         |
| G500      | 1354                          | 1580                          | 2904                          | 0.676     | 0.162        | 16.71         |
| G600      | 1345                          | 1585                          | 2893                          | 0.707     | 0.149        | 16.92         |
| G700      | 1337                          | 1590                          | 2900                          | 0.812     | 0.146        | 17.05         |
| G800      | 1340                          | 1590                          | 2902                          | 0.918     | 0.165        | 17.23         |

---

---

**Table S3** The Electrical conductivity comparison of different materials.

| Name                   | Pyrolysis Temperature<br>(°C) | Electrical Conductivity<br>(S cm <sup>-1</sup> ) | Reference |
|------------------------|-------------------------------|--------------------------------------------------|-----------|
| G800                   | 800                           | ~3.3                                             | This wok  |
| RuO <sub>2</sub> /ACNF | 800                           | 0.59                                             | 1         |
| PPS $\alpha$ -CD       | 800                           | 0.62                                             | 2         |
| C-800                  | 900                           | 0.19                                             | 3         |

---

#### References

1. K. S. Yang and B. Kim, *Electrochim Acta*, 2015, 186, 337-344.
2. S. I. Yun, H. Lee and B. Kim, *J. Electroanal. Chem.*, 2020, 858, 113815.
3. M. Sevilla and A. B. Fuertes, *Carbon*, 2006, 44, 468-474.
